# Supplementary material
Source: PubMed Central journal article supplement (PMC8543371)
Supplement: NIHMS1737710-supplement-Supplementary_Information.pdf [file NIHMS1737710-supplement-Supplementary_Information.pdf]

**Supplementary Data Table 1. Data collection and refinement statistics**

|                                                     | RBD-AZD8895          | RBD-AZD1061              |
|-----------------------------------------------------|----------------------|--------------------------|
| <b>Data collection</b>                              |                      |                          |
| Space group                                         | P2 <sub>1</sub>      | P2 <sub>1</sub>          |
| Cell dimensions                                     |                      |                          |
| <i>a, b, c</i> (Å)                                  | 44.12, 81.58, 101.16 | 97.15, 152.52,<br>199.24 |
| $\alpha, \beta, \gamma$ (°)                         | 90.00, 94.60, 90.00  | 90.00, 94.74, 90.00      |
| Resolution (Å)                                      | 43.98(2.50)          | 35.21(3.00)              |
| <i>R</i> <sub>merge</sub>                           | 0.046(0.245)         | 0.231(0.810)             |
| CC1/2                                               | 0.0982(0.945)        | 0.986(0.89)              |
| <i>I</i> / $\sigma I$                               | 19.2(4.8)            | 6.4(2.3)                 |
| Completeness (%)                                    | 99.9(99.6)           | 99.9(100)                |
| Redundancy                                          | 3.7(3.7)             | 7.7(7.7)                 |
| <b>Refinement</b>                                   |                      |                          |
| Resolution (Å)                                      | 43.98-2.50           | 35.21-3.00               |
| No. reflections                                     | 93185                | 889918                   |
| <i>R</i> <sub>work</sub> / <i>R</i> <sub>free</sub> | 0.185/0.231          | 0.215/0.273              |
| No. atoms                                           |                      |                          |
| Protein                                             | 4794                 | 32639                    |
| Ligand/ion                                          | 50                   | 96                       |
| Water                                               | 220                  | 144                      |
| <i>B</i> -factors                                   |                      |                          |
| Protein                                             | 47.94                | 52.23                    |
| Ligand/ion                                          | 76.52                | 80.51                    |
| Water                                               | 42.68                | 32.83                    |
| R.m.s. deviations                                   |                      |                          |
| Bond lengths (Å)                                    | 0.0030               | 0.0023                   |
| Bond angles (°)                                     | 0.563                | 0.598                    |

\*One crystal for each dataset.

\*Values in parentheses are for highest-resolution shell.
